# Supplementary material
Source: publisher site journal article supplement (http://www.degruyter.com/publication/journal_key/CHEM/downloadAsset/CHEM_CFP_GAMSE24_ECAC24.pdf)
Supplement: Supplementary file 1 [file CHEM_CFP_GAMSE24_ECAC24.pdf]

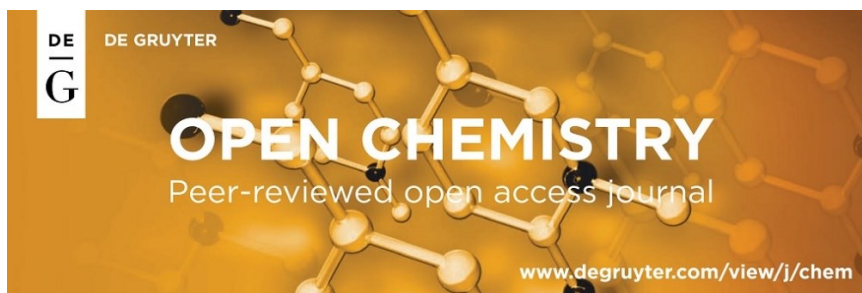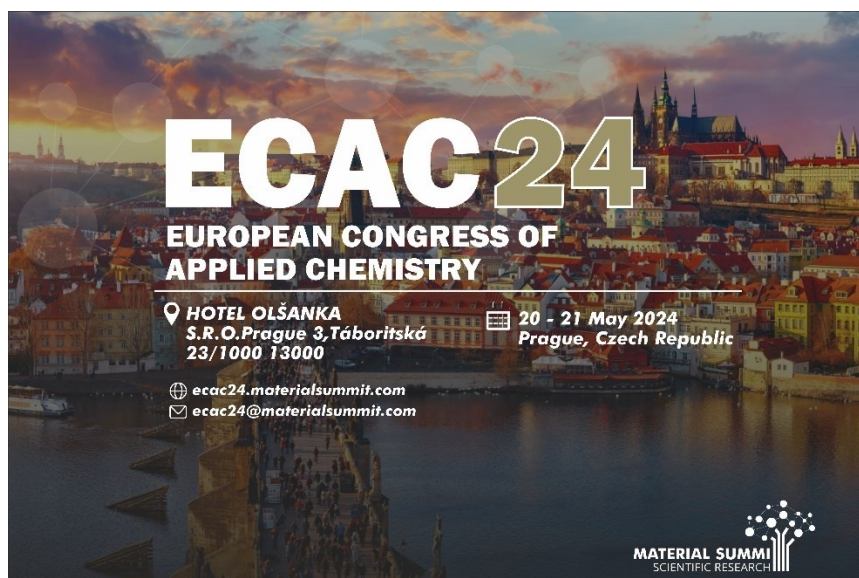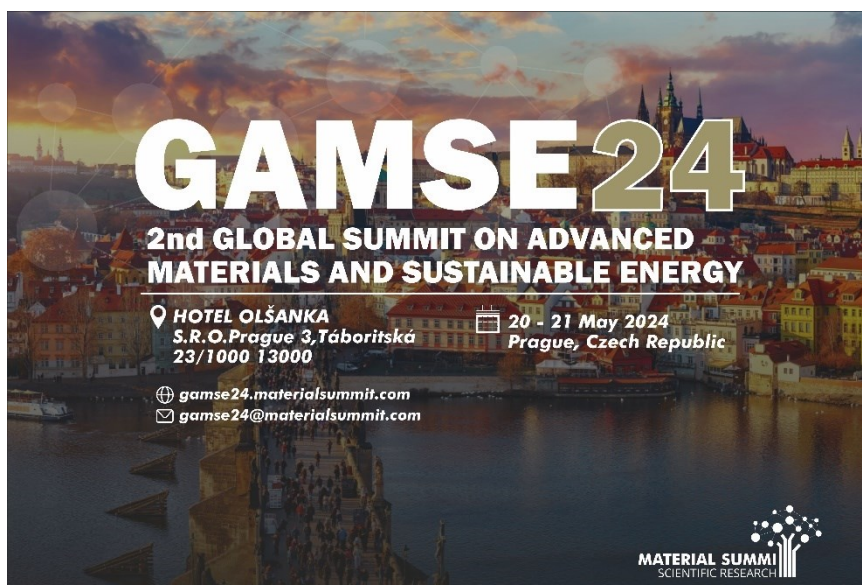

[DE GRUYTER](http://www.degruyter.com)

[2nd Global Summit on Advanced Materials and Sustainable Energy \(GAMSE24\)](#)

Prague, Czech Republic, 20-21 May 2024

[European Congress of Applied Chemistry \(ECAC24\)](#)

Prague, Czech Republic, 20-21 May 2024

## DESCRIPTION

European Congress of Applied Chemistry (ECAC24) will provide a platform for participants to share and discuss recent findings of their research covering all topics related to Chemistry. At ECAC24, scientists from industry, universities, and research institutions from Europe and beyond will meet in Prague to discuss the latest research and industrial applications in all fields of chemistry, process engineering, biotechnology and related fields. The conference unites chemical and process engineers, biotechnologists, bioprocess experts, chemists, material scientists and related disciplines with a focus on applied research and development.

GAMSE24 is an international conference that aims to bring together scientists, researchers and industrialists from all over the world on a common platform to discuss and share recent advances in Engineering, Materials Science, Chemistry, and Physics. GAMSE24 aims to bring together scientists, researchers, and practitioners in order to discuss and share cutting-edge development in the field. GAMSE24 provides an ideal platform and opportunity for all the young researchers to connect with eminent Scientists and Industrialists. The Conference is a premier enlightening and networking for all industry stakeholders, policy makers, investors, industry and research community to exchange experiences and challenges related to the development and scaling up in the field of engineering, materials science, chemistry, biology and physics.

<https://gamse24.materialsummit.com/>

<https://ecac24.materialsummit.com/>

**Submission deadline: 31.07.2024**

## HOW TO SUBMIT

The authors are kindly invited to register at our paper [processing system](#) and submit their contribution (both original papers or reviews are welcome). We offer a discount to for attendees of the conference. **All attendees of both conferences will receive 25 % discount for our Open Chemistry. Please write about attending the conference in the cover letter.** All manuscripts will undergo the standard peer-review process (single-blind, at least two independent reviewers) and will be treated in the same way as other regular articles (indexing, abstracting, immediate publication, etc.). Instructions for authors are available [here](#).

In case of any questions please contact Open Chemistry Managing Editor:  
Małgorzata Komadowska ([openchemistry@degruyter.com](mailto:openchemistry@degruyter.com)).

<https://www.degruyter.com/chem>
